# 1 Real-world smartphone data can trace 2 the behavioural impact of epilepsy: A 3 Case study

4  
5 Arthur R van Nieuw Amerongen<sup>†‡</sup>, Anne Marthe Meppelink<sup>†</sup>, Arko Ghosh<sup>§\*</sup>, Roland D Thijs<sup>†‡#\*</sup>

6 <sup>†</sup> Stichting Epilepsie Instellingen Nederland (SEIN), Heemstede, The Netherlands

7 <sup>‡</sup> Department of Neurology, Leiden University Medical Center, Leiden, The Netherlands

8 <sup>§</sup> Cognitive Psychology Unit, Institute of Psychology, Leiden University, Leiden, The Netherlands

9 <sup>#</sup> UCL Queen Square Institute of Neurology, London WC1N 3BG United Kingdom

10  
11 \*contributed equally

## 12 13 E-mail addresses:

14 Arthur R van Nieuw Amerongen

a.r.van\_nieuw\_amerongen@lumc.nl

15 Anne Marthe Meppelink

ameppelink@sein.nl

16 Arko Ghosh

a.ghosh@fsw.leidenuniv.nl

17 Roland D Thijs

rthijs@sein.nl

18  
19 **Corresponding author:** Roland D Thijs, rthijs@sein.nl

20 **Acknowledgements:** This study was funded by Health-Holland, Top Sector Life Sciences &  
21 Health Netherlands Organization for Health Research and Development (ZonMW) [Brain@home,  
22 Project number: 114025101].

23 R.D.T. is supported by the Christelijke Vereniging voor de Verpleging van Lijders aan Epilepsie,  
24 and by research grants from the Dutch National Epilepsy Fund (EpilepsieNL),

25 This study leveraged the support to A.G. by a research grant from Velux Stiftung (Project number:  
26 1283).

27 **Conflicts of interest:** A.G. is a cofounder of QuantActions AG, Zurich, Switzerland which focus  
28 on converting smartphone touchscreen interactions to mental health indicators. Software and  
29 data services from QuantActions were used to monitor smartphone activity.

30 R.D.T. reports personal fees from UCB, Theravarance, Novartis, Zogenix, Arvelle, Angelini,  
31 Medtronic, and NewLife Wearables.

32 **Data availability statement:** The data supporting this study's findings are available from the  
33 corresponding author upon reasonable request.

34 **Code availability statement:** The codes used in this study is available on a Git repository:  
35 [https://github.com/CODELABCODELIB/Casestudy\\_epi\\_SEIN\\_2023](https://github.com/CODELABCODELIB/Casestudy_epi_SEIN_2023)

36 **Ethics approval statement:** The Medical Ethics Committee (Leiden-Den Haag-Delft - P19.088)  
37 approved the study.

38 **Patient consent statement:** The subject provided informed consent for participation.

39 **Clinical trial registration:** This is part of a registered clinical trial

40 NOTE: This preprint reports new research that has not been certified by peer review and should not be used to guide clinical practice.  
(<https://clinicaltrials.gov/study/NCT04617418>).

41 **Abstract**

42 Neurobehavioural comorbidities have a detrimental effect on the quality of life of people with  
43 epilepsy, yet tracking their impact is challenging as behaviour may vary with seizures and anti-  
44 seizure medication side effects. Smartphones have the potential to monitor day-to-day  
45 neurobehavioural patterns objectively. We present the case of a man in his late twenties with  
46 refractory focal epilepsy in whom we ascertained the effects of ASMs withdrawal and a focal-to-  
47 bilateral tonic-clonic convulsion on his touchscreen interactions. Using a dedicated app, we  
48 recorded over 185 days, the timestamps of 718,357 interactions. We divided the various  
49 smartphone behaviours according to the next-interval dynamics of the interactions by using a  
50 joint interval distribution (JID). We analysed JIDs during two ASM load transitions: before versus  
51 during tapering and restarting medication versus tapering. Cluster-based permutation testing  
52 revealed significant differences, with accelerated next-interval dynamics during tapering and a  
53 reversal upon medication restart. We also compared the JID of the fbTCS day to the average of  
54 the three days before, showing markedly slower next-interval dynamics on the day of the  
55 convulsion. This suggests that smartphone interactions' temporal dynamics may help monitor  
56 neurobehavioural comorbidities in epilepsy.

57

## 58 **Introduction**

59 Neurobehavioural comorbidities have a detrimental effect on the quality of life in people with  
60 epilepsy.<sup>1,2</sup> Their impact on day-to-day behaviour is, however, difficult to monitor as the burden  
61 may fluctuate over time due to medication changes or seizure occurrence. The usual approach  
62 to quantifying these impairments is to use standardised tests and questionnaires in a hospital-  
63 based setting, thus only providing a snapshot in time.

64 Smartphones have the potential to monitor day-to-day neurobehavioral patterns objectively.  
65 Recent work demonstrated its value in various neurological conditions, including Parkinson's  
66 disease and multiple sclerosis.<sup>3,4</sup> We demonstrated that smartphone touchscreen interactions  
67 show increased behavioural ageing in people with epilepsy.<sup>5</sup> Interestingly, we found a 10-year  
68 gap between the smartphone-based estimated age and the chronological age, which parallels  
69 findings in MRI studies.<sup>6</sup> We postulated that, apart from neurodegeneration, drug-induced  
70 central nervous system side effects and the occurrence of seizures contribute to accelerated  
71 behavioural ageing in epilepsy.

72 We present a single case study of a man in his late twenties in whom we examined the effect of  
73 anti-seizure medication changes and seizures on smartphone touchscreen interactions. He  
74 participated in a prospective cohort study relating smartphone interactions to self-reported  
75 seizures for six months (NCT04617418). During the study, he was admitted to an epilepsy  
76 monitoring unit (EMU), for a five-day pre-surgical evaluation. He had refractory right temporal  
77 lobe epilepsy with weekly focal impaired awareness seizures and yearly focal to bilateral tonic-  
78 clonic convulsions. No aetiology was identified despite having had several MRI scans.

79 In this case, we leverage the ground truth information on seizures provided by the video-EEG  
80 recordings and the anti-seizure medication (ASM) withdrawal linked to the admission.

## 81 **Materials & methods**

82 The Leiden-Den Haag-Delft Medical Ethics Committee approved the study, and the subject  
83 consented to participate. He installed the TapCounter app (QuantActions, Lausanne) on his  
84 smartphone, which recorded the timestamps of all touchscreen interactions and kept a seizure  
85 diary for six months. The data from the app was automatically transferred to a cloud-based  
86 server (taps.ai, QuantActions, Lausanne).

87 The subject participated in the study from May to November 2021. Seven hundred eighteen  
88 thousand three hundred fifty-seven touchscreen interactions were recorded over 185  
89 consecutive days, with a median of 3,311 daily interactions (interquartile range (IQR) 2,531 to  
90 4,766 interactions). He used lamotrigine and perampanel, which were reduced before  
91 admission and completely withdrawn during admission (figure 1a). He reported a total of 14  
92 focal impaired awareness seizures outside the admission period. The five-day video-EEG  
93 recording documented nine focal aware seizures (FAS) with autonomic onset on the first day,  
94 four on the second day, one electrographic seizure whilst asleep on each of the first two nights,  
95 and one focal to bilateral tonic-clonic convulsion originating from the temporal lobe soon after  
96 wake-up on the fourth day.

97 We downloaded the data from the online data collection manager (taps.ai, QuantActions,  
98 Lausanne). We applied a previously validated sleep and rise time detection algorithm to  
99 separate the touchscreen interactions per study day.<sup>7</sup> We then calculated joint-interval  
100 distributions (JID) for the inter-touch intervals (ITI) from each day (figure 1b). We created a 2D  
101 space by relating each ITI (at time  $k$ ) against its subsequent interval (at time  $k + 1$ ). We operated  
102 2D kernel density estimation (Gaussian kernel with a bandwidth of 0.1) over the  $\log_{10}$ -  
103 transformed 2D space. We subsequently discretised the continuous output of the kernel density  
104 estimation using 50 bins per dimension from ~30 milliseconds to 100 seconds, thus obtaining a  
105 50 by 50 matrix of 2D bins.<sup>8</sup>

106 To evaluate the impact of ASM tapering on touchscreen interactions, we categorised the data  
107 into three distinct periods: days before the ASM tapering (n=82), the tapering period itself (12  
108 days), and days after ASM tapering (n=91). We evaluated the contrasts between the daily JIDs  
109 from the pre-tapering period vs. the tapering period, and the daily JIDs from the tapering period  
110 vs. the post-tapering period.

111 We employed a permutation-based clustering approach to identify clusters of 2D bins with  
112 significant differences in touchscreen interactions and to account for multiple testing  
113 associated with many individual t-tests (2500 t-statistics) when comparing JIDs bin-wise.<sup>9</sup>  
114 Specifically, we performed 1000 random label permutations for each comparison (pre-tapering  
115 vs. tapering and tapering vs. post-tapering). At each iteration, we did a t-test for all 2D bins within  
116 the JIDs and identified clusters in the 2D space of t-statistics. We defined clusters as contiguous  
117 sets of 2D bins, where each bin has a t-statistic corresponding to a p-value of 0.001 or lower.  
118 This method provided us with a reference distribution of maximal cluster sizes under the null  
119 hypothesis that both groups are indistinguishable. This allowed us to assess the statistical  
120 significance of cluster sizes observed in our original data. We considered a cluster size above  
121 the 95<sup>th</sup> percentile of the reference distribution as statistically significant.

122 To assess the effect of seizures on touchscreen interactions, we compared the day of the  
123 convulsion during EMU admission (day 4) with the three days before. We first isolated the  
124 touchscreen interactions on the day of the convulsion and computed a JID for that day. Notably,  
125 this convulsion-related JID contains mostly post-ictal data, as the convulsion occurred shortly  
126 after awakening. We then computed the average JID from the three days before the convulsion  
127 and contrasted this distribution with that from the convulsion day to estimate the difference per  
128 bin in both JIDs.

## 129 **Results**

130 The cluster-based permutation test showed significant differences in the probability  
131 distributions of interactions for comparing ASM load conditions. These differences were  
132 expressed by an increased probability of fast next-interval dynamics following tapering, which  
133 reversed after restarting the medication (figure 2a).

134 The probability distributions of the interactions showed marked contrasts between the days with  
135 and without focal to bilateral tonic-clonic convulsion, expressing an increased probability of  
136 slow next-interval dynamics on the day of the convulsion compared to the three preceding days  
137 (figure 2b).

## 138 **Discussion**

139 We found marked behavioural changes following an focal to bilateral tonic-clonic convulsion  
140 and in response to ASM changes. These changes were recorded with a regular smartphone with  
141 a negligible additional burden to the user. Touchscreen interactions show an increased  
142 probability of slow next-interval dynamics following a convulsion and increasing ASM load. In  
143 contrast, tapering showed the opposite (i.e. an increased likelihood of fast next-interval  
144 dynamics). The pattern is similar to what is seen with increasing chronological age.<sup>5,10</sup>

145 ASMs users commonly report cognitive side effects<sup>11</sup>, and they are a robust predictor of reduced  
146 quality of life.<sup>1</sup> Information on these effects is helpful during the titration of ASMs, but an  
147 adequate, unobtrusive tracking method is lacking. Seizures may also aggravate cognitive  
148 impairments or mood disorders,<sup>12</sup> but are similarly challenging to monitor as self-reported  
149 seizure diaries are often inaccurate.<sup>13</sup>

150 This case suggests smartphones may address the need to track medication and seizure-related  
151 behavioural changes. It also underscores the complexity of the fluctuations in subject status  
152 that cannot be captured by cross-sectional assessments such as questionnaires or self-reports.  
153 The neurobehavioural substrates are still largely unexplored, but there is some evidence that  
154 touchscreen interactions correlate with conventional assessments of reaction time<sup>14</sup> and

155 reliably estimate biological age.<sup>5</sup> Interestingly, epileptiform discharges coincide with distinct  
156 profiles, suggesting that even subtle changes can be monitored.<sup>8</sup>

157 We propose that the increased behavioural ageing in epilepsy is partly explained by ASM  
158 exposure and seizure occurrence. ASMs may cause a broad spectrum of cognitive changes,  
159 including impaired executive function, attention and reaction time.<sup>15,16</sup> Our finding of significant  
160 behavioural changes following ASM load adjustment is important because the cognitive and  
161 behavioural side effects of the ASMs prescribed to the case (lamotrigine and perampanel) are  
162 relatively unknown but relevant.<sup>17,18</sup> A more pronounced change in smartphone behaviour could  
163 be expected with ASMs associated with adverse cognitive effects or with polytherapy.<sup>15</sup> Notably,  
164 the net accelerating ASM effect was significant. However, the period also included the day of the  
165 convulsive event, which showed a reverse effect on smartphone behaviour (i.e. a deceleration of  
166 interactions).

167 We grouped touchscreen interactions into daily interaction profiles, as hourly profiles would  
168 yield variable amounts of data due to intermittent phone use. While the interaction profile of the  
169 day with focal to bilateral tonic-clonic convulsion included a pre- and post-ictal phase, it  
170 predominantly reflects the post-ictal phase as the seizure occurred soon after wake-up. The  
171 post-ictal state can manifest in a variety of ways, including altered consciousness and cognitive  
172 dysfunction.<sup>19</sup> Cognitive impairments may last for hours or even days after a focal to bilateral  
173 tonic-clonic convulsion. Our case's loss of rapid touchscreen interactions may well reflect these  
174 post-ictal signs.

175 We only examined the effects of the convulsion without evaluating the days with focal seizures.

176 We anticipated that the cognitive impact of focal seizures, particularly those with retained  
177 awareness, is considerably less. Many seizures recorded and a sufficiently long seizure-free  
178 period are necessary to evaluate their effect on smartphone behaviour. We selected a single  
179 case to demonstrate the impact of medication withdrawal and the recorded convulsion. Cohort

180 studies are needed to establish our findings' generalisability and ascertain the potential of

181 touchscreen profiles in epilepsy care.

182



183

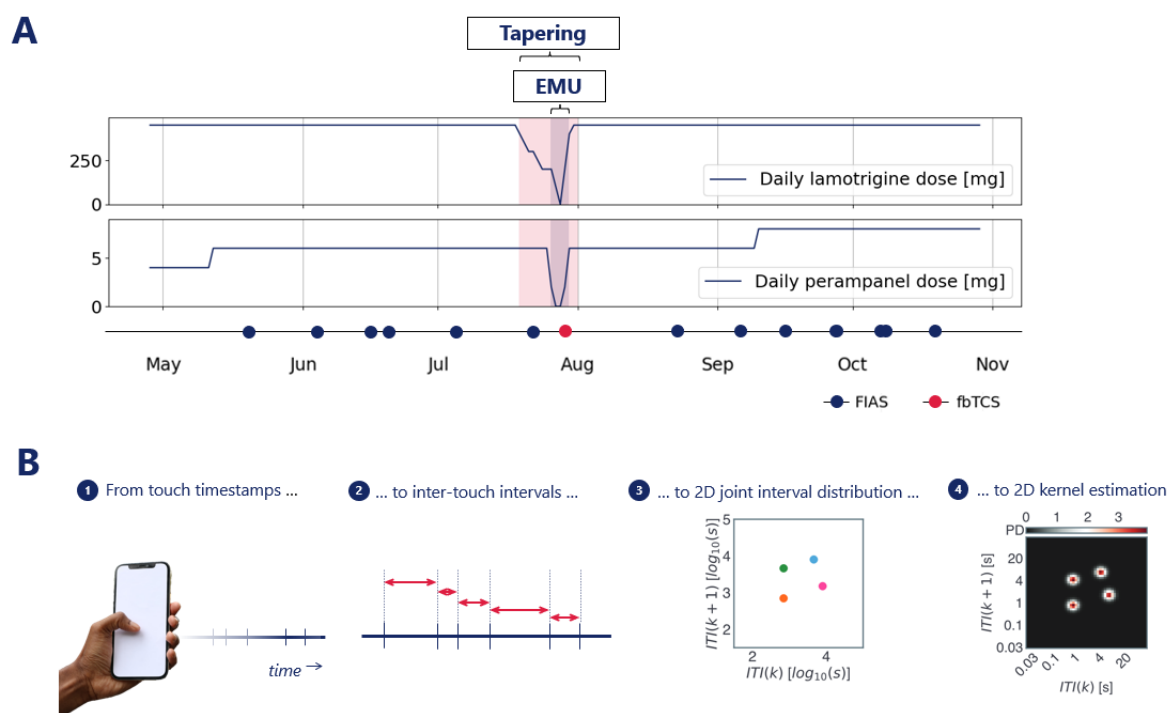

184

185 **Figure 1**

186 **A)** Timeline of the study period. The subject participated from May to November 2021. He  
 187 reported several seizures, including one convulsion during admission. The anti-seizure  
 188 medication load was stable for the study period; his medication was tapered before admission.

189 **B)** A smartphone app recorded the timestamps of all touchscreen interactions (1). We  
 190 calculated the inter-touch intervals (ITI) (2) and plotted each ITI at time  $k$  against the following ITI  
 191 at time  $k+1$  (3). We then estimated a 2D kernel density (4).

192 **Abbreviations:** EMU: epilepsy monitoring unit; fbTCS: focal to bilateral tonic clonic seizure;

193 FIAS: focal impaired awareness seizure; ITI: inter-touch interval

194

195

196

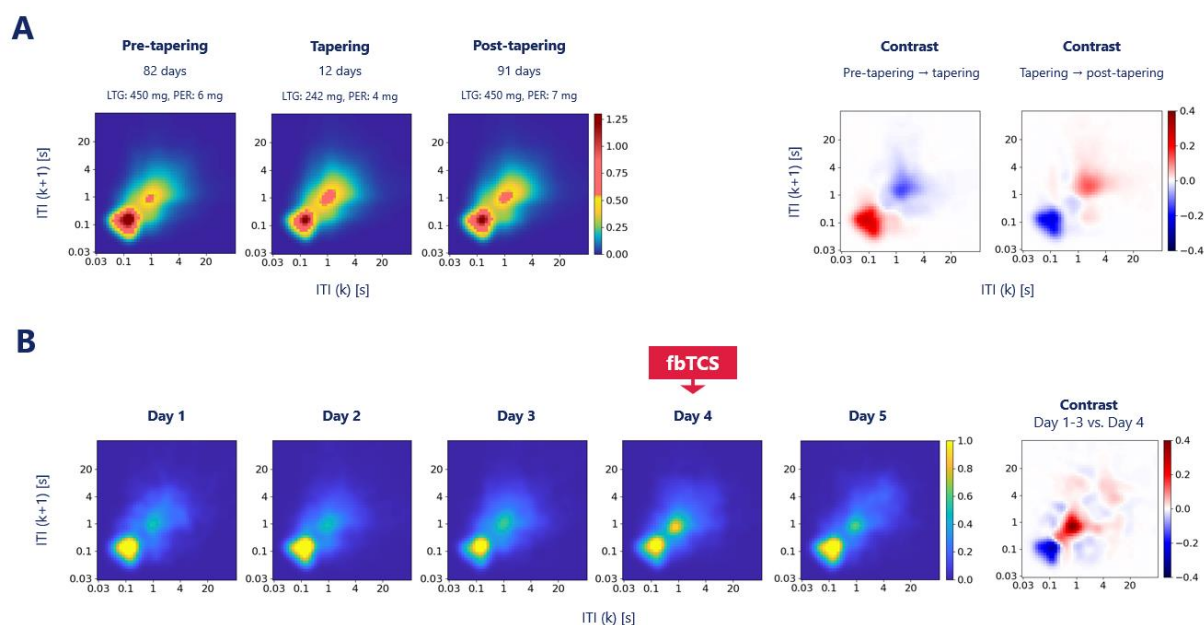

197

## 198 **Figure 2**

199 **A)** Comparison of touchscreen behavioural patterns between pre-tapering, tapering and post-  
200 tapering period. Left: daily joint interval distributions (JID) of inter-touch intervals averaged per  
201 period. Right: Contrasts between the daily JIDs from the pre-tapering and tapering periods and  
202 between the daily JIDs from the tapering and post-tapering periods. Cluster-based permutation  
203 testing revealed significant differences for both transitions (i.e. pre-tapering → tapering and  
204 tapering → post-tapering), reflected by an acceleration of the next-interval dynamics during  
205 tapering that reversed on medication restart.

206 **B)** Comparison of touchscreen behavioural patterns between a day with a convulsion during 5-  
207 day admission. Shortly after rise time on day 4, the man experienced a convulsive seizure. The  
208 first five figures are JIDs of smartphone touchscreen interactions during admission. Far-right  
209 figure: the contrast between the JID of the day with fbTCS and the JIDs of the three days before. It  
210 shows a deceleration of the next-interval dynamics on the day of the fbTCS.

211 **Abbreviations:** fbTCS: focal to bilateral tonic clonic seizure; ITI: inter-touch interval; LGT:  
212 lamotrigine; PER: perampanel

## 213 **References**

- 214 1. Perucca P, Carter J, Vahle V, Gilliam FG. Adverse antiepileptic drug effects: Toward a  
215 clinically and neurobiologically relevant taxonomy. *Neurology*. 2009; 72(14):1223–9.
- 216 2. Hermann BP, Struck AF, Busch RM, Reyes A, Kaestner E, McDonald CR. Neurobehavioural  
217 comorbidities of epilepsy: towards a network-based precision taxonomy. *Nat Rev Neurol*.  
218 2021; 17(12):731–46.
- 219 3. Wan S, Liang Y, Zhang Y, Guizani M. Deep Multi-Layer Perceptron Classifier for Behavior  
220 Analysis to Estimate Parkinson’s Disease Severity Using Smartphones. *IEEE Access*. 2018;  
221 6:36825–33.
- 222 4. Apolinário-Hagen J, Menzel M, Hennemann S, Salewski C. Acceptance of Mobile Health  
223 Apps for Disease Management Among People With Multiple Sclerosis: Web-Based Survey  
224 Study. *JMIR Form Res*. 2018; 2(2):e11977.
- 225 5. Ceolini E, Brunner I, Bunschoten J, Majoie MHJM, Thijs RD, Ghosh A. A model of healthy  
226 aging based on smartphone interactions reveals advanced behavioral age in neurological  
227 disease. *iScience*. 2022; 25(8):104792.
- 228 6. Baecker L, Garcia-Dias R, Vieira S, Scarpazza C, Mechelli A. Machine learning for brain age  
229 prediction: Introduction to methods and clinical applications. *eBioMedicine*. 2021;  
230 72:103600.
- 231 7. Borger JN, Huber R, Ghosh A. Capturing sleep–wake cycles by using day-to-day  
232 smartphone touchscreen interactions. *Npj Digit Med*. 2019; 2(1):1–8.
- 233 8. Duckrow RB, Ceolini E, Zaveri HP, Brooks C, Ghosh A. Artificial neural network trained on  
234 smartphone behavior can trace epileptiform activity in epilepsy. *iScience*. 2021;  
235 24(6):102538.
- 236 9. Ceolini E, Ghosh A. Common multi-day rhythms in smartphone behavior. *Npj Digit Med*.  
237 2023; 6(1):1–9.
- 238 10. Ceolini E, Kock R, Band GPH, Stoet G, Ghosh A. Temporal clusters of age-related  
239 behavioral alterations captured in smartphone touchscreen interactions. *iScience*. 2022;  
240 25(8):104791.
- 241 11. Kennedy GM, Lhatoo SD. CNS adverse events associated with antiepileptic drugs. *CNS*  
242 *Drugs*. 2008; 22(9):739–60.
- 243 12. Novak A, Vizjak K, Rakusa M. Cognitive Impairment in People with Epilepsy. *J Clin Med*.  
244 2022; 11(1):267.
- 245 13. Mielke H, Meissner S, Wagner K, Joos A, Schulze-Bonhage A. Which seizure elements do  
246 patients memorize? A comparison of history and seizure documentation. *Epilepsia*. 2020;  
247 61(7):1365–75.
- 248 14. Balerna M, Ghosh A. The details of past actions on a smartphone touchscreen are  
249 reflected by intrinsic sensorimotor dynamics. *Npj Digit Med*. 2018; 1(1):1–5.

- 250 15. Witt J-A, Helmstaedter C. Monitoring the cognitive effects of antiepileptic  
251 pharmacotherapy--approaching the individual patient. *Epilepsy Behav EB*. 2013;  
252 26(3):450–6.
- 253 16. van Schooneveld MMJ, van Erp N, Boshuisen K, Meekes J, Braun KPJ. Withdrawal of  
254 antiepileptic drugs improves psychomotor speed after childhood epilepsy surgery.  
255 *Epilepsy Res*. 2013; 107(1–2):200–3.
- 256 17. Aldenkamp AP, Baker G. A Systematic Review of the Effects of Lamotrigine on Cognitive  
257 Function and Quality of Life. *Epilepsy Behav*. 2001; 2(2):85–91.
- 258 18. Rugg-Gunn F. Adverse effects and safety profile of perampanel: a review of pooled data.  
259 *Epilepsia*. 2014; 55 Suppl 1:13–5.
- 260 19. Pottkämper JCM, Hofmeijer J, van Waarde JA, van Putten MJAM. The postictal state — What  
261 do we know? *Epilepsia*. 2020; 61(6):1045–61.
- 262

**A**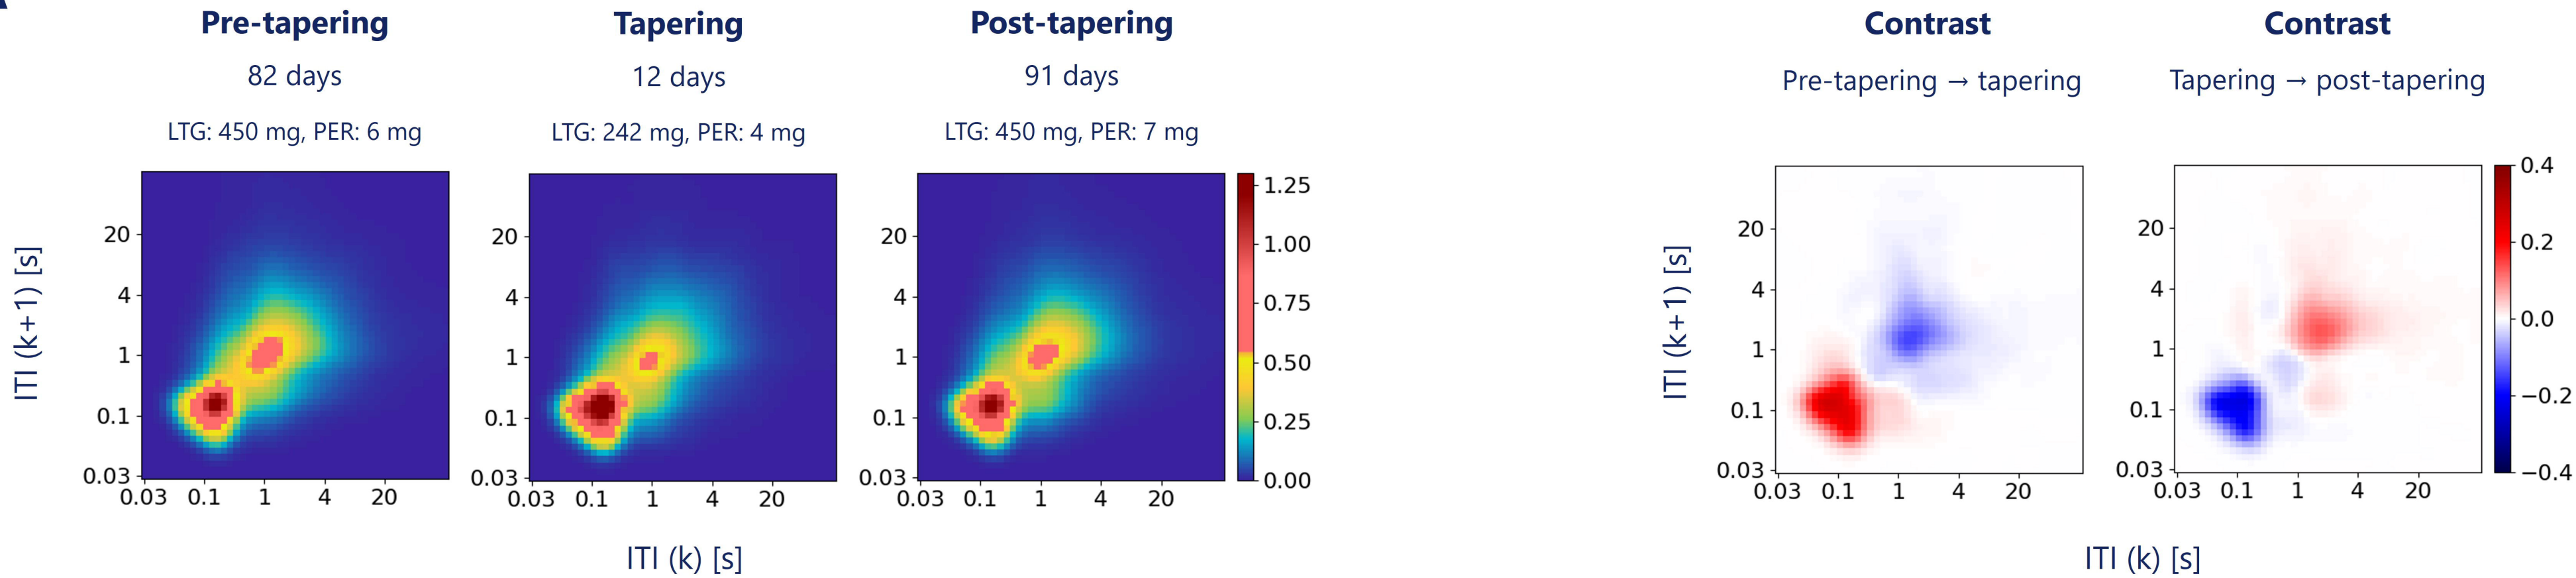**B**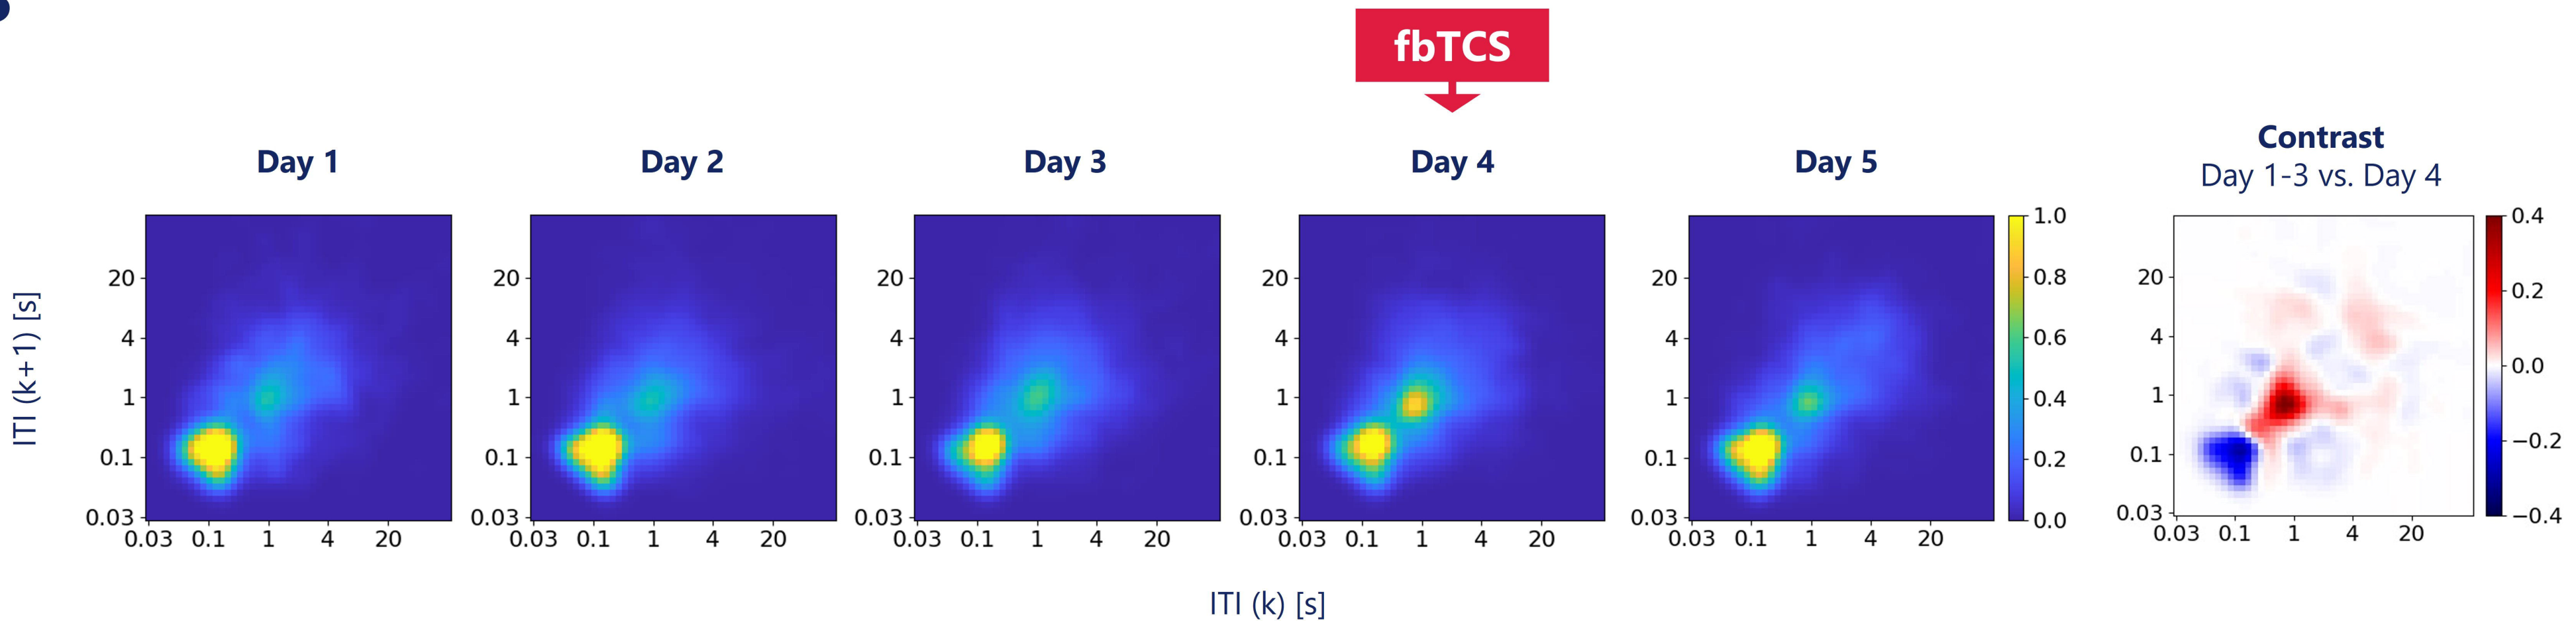

**A**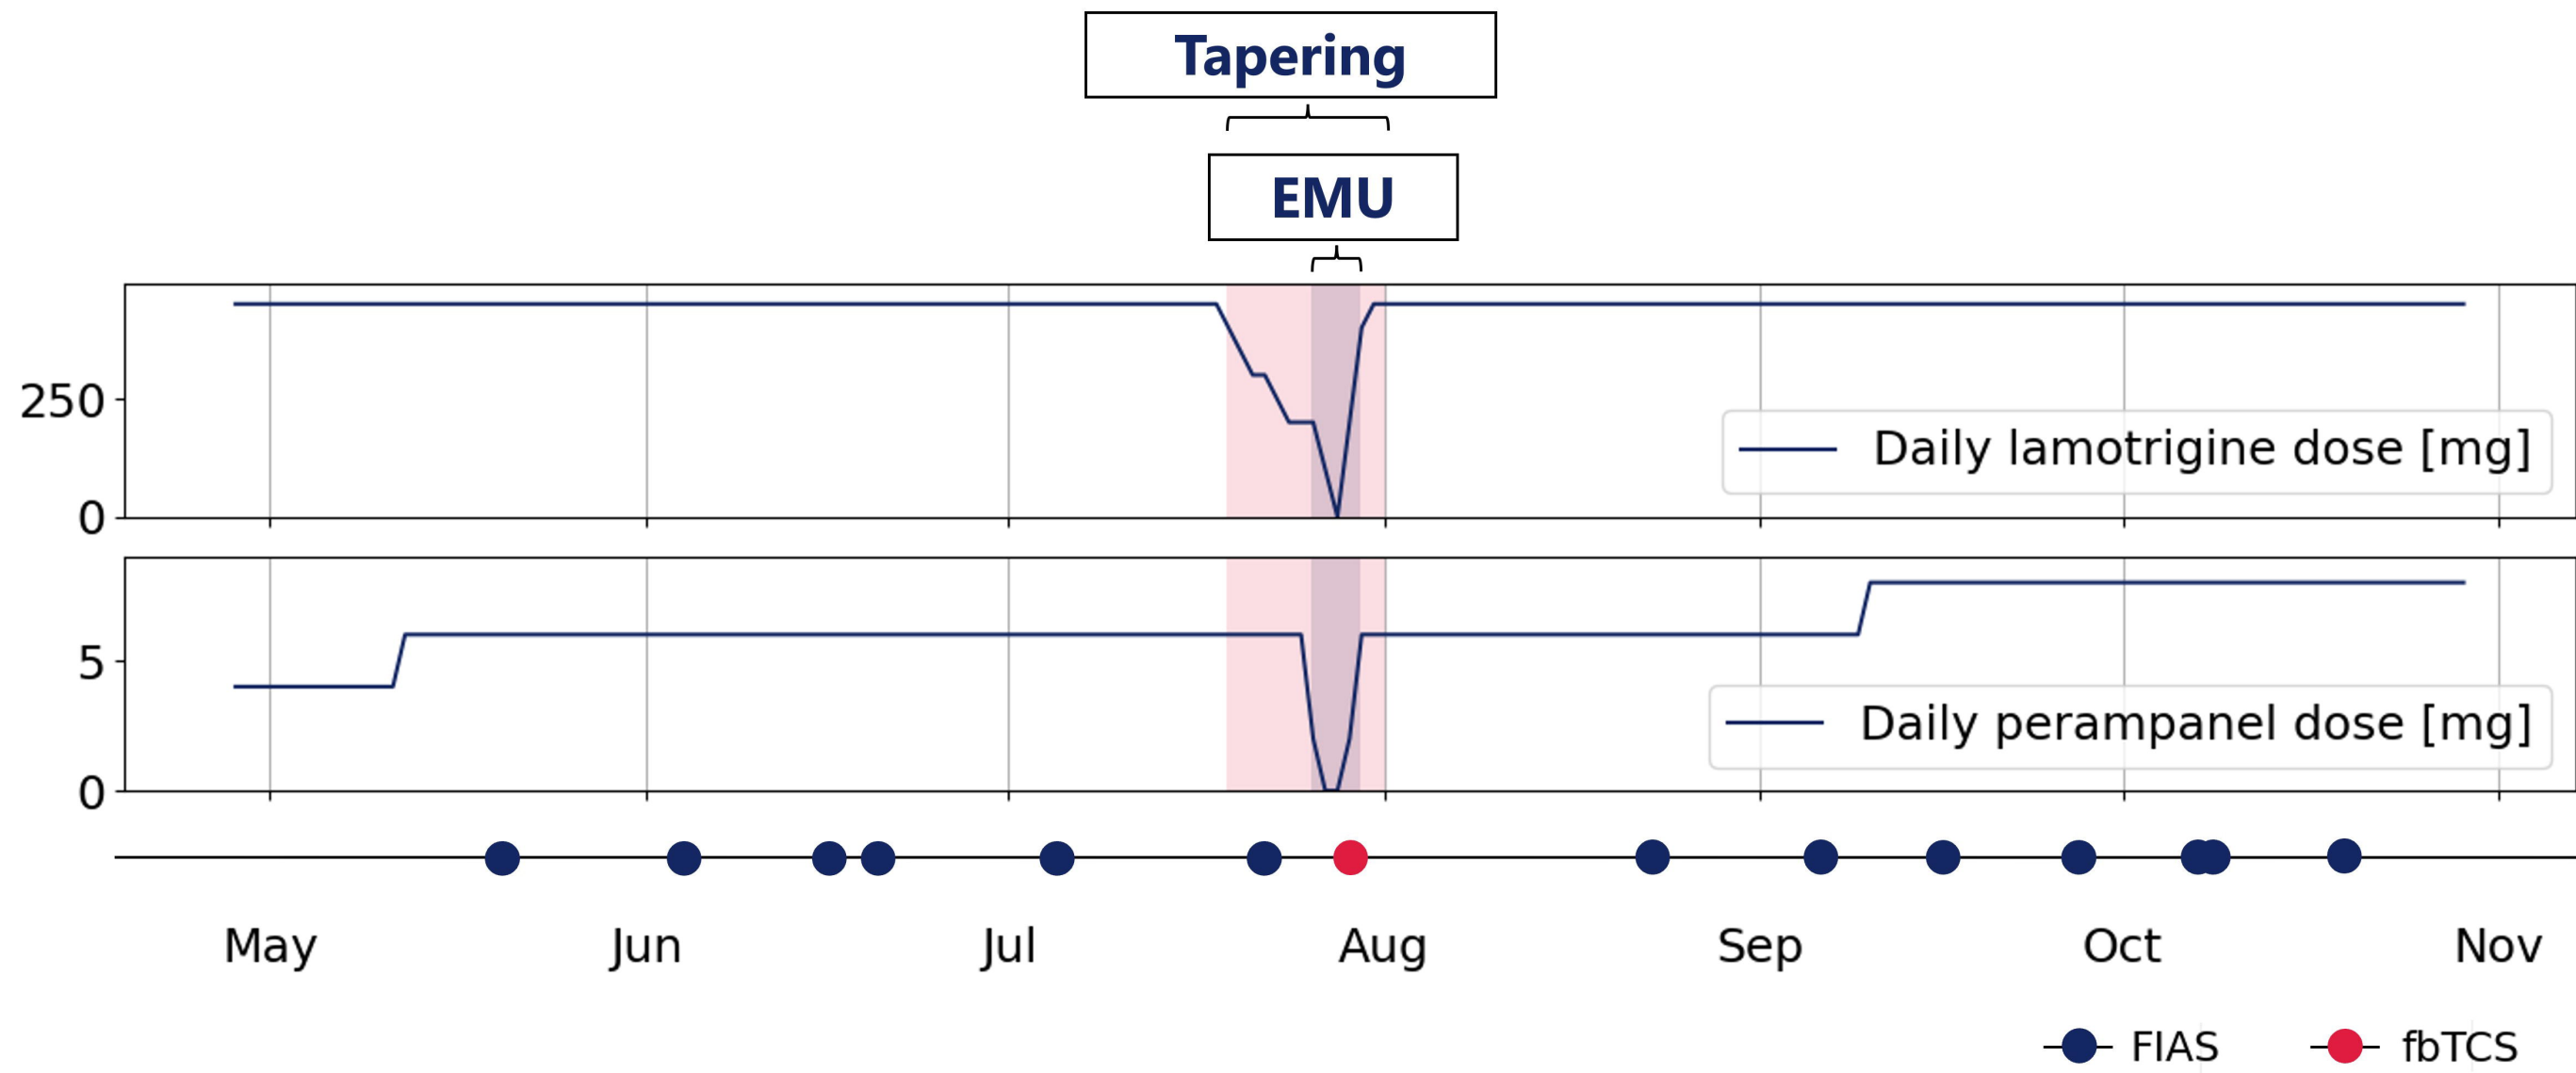**B**

- ① From touch timestamps ...      ② ... to inter-touch intervals ...      ③ ... to 2D joint interval distribution ...      ④ ... to 2D kernel estimation

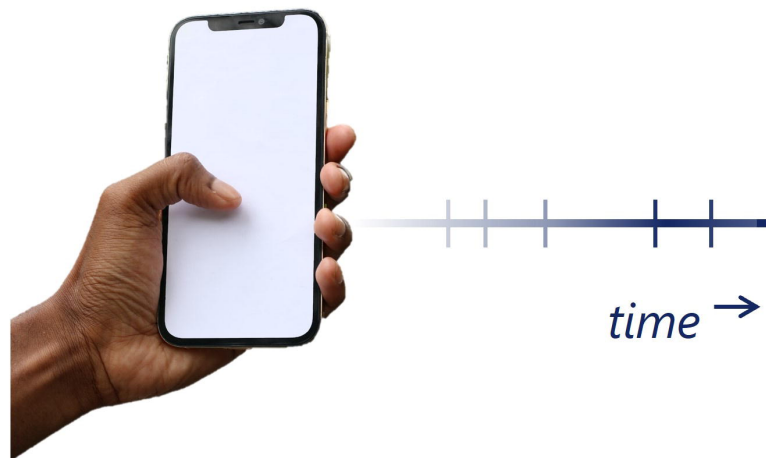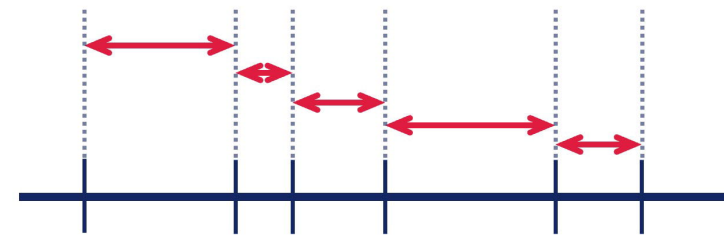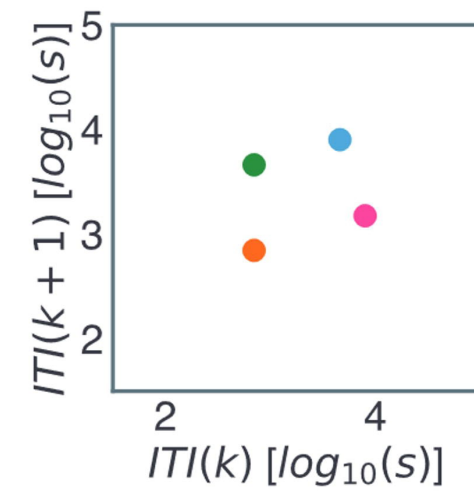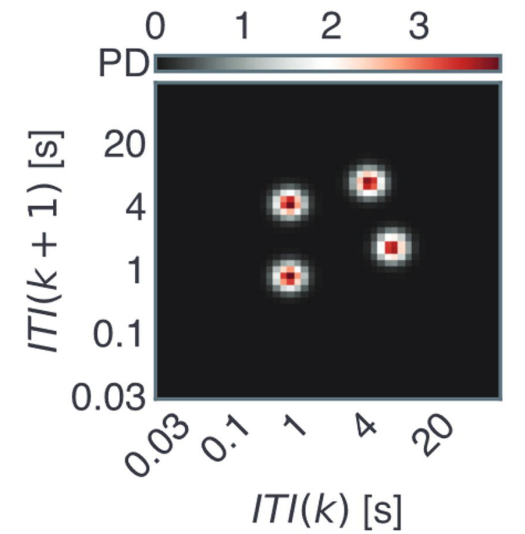

Source: https://medrxiv.org/content/medrxiv/early/2024/02/01/2024.01.01.23300494.full.pdf
